# Supplementary material for: Impact of Early Medical Treatment for Transgender Youth: Protocol for the Longitudinal, Observational Trans Youth Care Study
Source: PubMed Central journal article supplement (PMC6647755; doi:10.2196/14434), 2019-07-09
Supplement: resprot_v8i7e14434_app1.pdf [file resprot_v8i7e14434_app1.pdf]

| Stage | Pubic Hair                                                                                | Breast                                                                                         | Testicular volume |
|-------|-------------------------------------------------------------------------------------------|------------------------------------------------------------------------------------------------|-------------------|
| I     | No pubic hair                                                                             | No glandular tissue, only the nipple papilla is elevated beyond the flat chest contour         | < 4mL             |
| II    | Small amount of long, downy hair; may be pigmented                                        | Breast bud forms with minimal glandular tissue, areola widens                                  | 4-8 mL            |
| III   | Darker, more curly and rougher texture                                                    | Breast tissue beyond the nipple areolar complex (NAC border), forming the shape of the breasts | 10-15 mL          |
| IV    | Adult hair quality in limited area                                                        | Increased breast size and differentiation of NAC above the contour of the breast               | 15-20 mL          |
| V     | Adult hair quality that extends to the medial thighs in the shape of an inverted triangle | Adult final size, areola regresses and matches the contour of the breast                       | >25mL             |
