# Supplementary material for: Impact of Early Medical Treatment for Transgender Youth: Protocol for the Longitudinal, Observational Trans Youth Care Study
Source: PubMed Central journal article supplement (PMC6647755; doi:10.2196/14434), 2019-07-09
Supplement: resprot_v8i7e14434_app2.pdf [file resprot_v8i7e14434_app2.pdf]

| Blocker Cohort – Youth Survey Measures                                                  |                                                                                                       |
|-----------------------------------------------------------------------------------------|-------------------------------------------------------------------------------------------------------|
| Construct                                                                               | Measure                                                                                               |
| Time of Completion: Baseline, 6-month, 12-month, 18-month, & 24-month follow-up periods |                                                                                                       |
| Weight Bearing Exercise                                                                 | Physical Activity Questionnaire                                                                       |
| Demographics                                                                            | Demographic questions for Blocker Cohort Youth                                                        |
| Depression                                                                              | BDI-Y                                                                                                 |
| Anxiety                                                                                 | Revised Children’s Manifest Anxiety Scale: Second Edition (RCMAS-2 – What I Think and Feel)           |
| Quality of Life                                                                         | Pediatric Quality of Life Inventory – Child Report (PedsQL–CH)                                        |
| Suicidality                                                                             | Suicidal Ideation Scale                                                                               |
| Self-Harm                                                                               | Two questions embedded in demographics section                                                        |
| Body Esteem                                                                             | Body Esteem Scale                                                                                     |
| Social Relationships                                                                    | Emotional Support / Friendship / Loneliness / Perceived Hostility / Perceived Rejection – NIH Toolbox |
| Self-Efficacy                                                                           | Self-Efficacy (CAT 8-12)– NIH Toolbox                                                                 |
| Perceived Parent Support                                                                | Parental Support Scale – Youth Version                                                                |
| Resiliency                                                                              | Connor-Davidson Resilience Scale                                                                      |
| Self-Perception                                                                         | Harter’s Self-Perception Profiles for Adolescents & Children                                          |
| Time of Completion: 6-month, 12-month, 18-month & 24-month follow-up periods            |                                                                                                       |
| Side Effects of GnRH Agonists                                                           | Physical and emotional effects of hormone blocker use                                                 |
| Time of Completion: 12-month & 24-month follow-up periods                               |                                                                                                       |
| Adolescent Life-Change Event Scale                                                      | Life changes in past 6 months (only participants 9 years and older)                                   |

| MINI                                                                 |                                                                                                                                                                                                                                                                                                                                                                                                                                                                                                                                                               |
|----------------------------------------------------------------------|---------------------------------------------------------------------------------------------------------------------------------------------------------------------------------------------------------------------------------------------------------------------------------------------------------------------------------------------------------------------------------------------------------------------------------------------------------------------------------------------------------------------------------------------------------------|
| Construct                                                            | Measure                                                                                                                                                                                                                                                                                                                                                                                                                                                                                                                                                       |
| Time of Completion: Baseline, 12-month, & 24-month follow-up periods |                                                                                                                                                                                                                                                                                                                                                                                                                                                                                                                                                               |
| DSM Diagnoses                                                        | Mini International Neuropsychiatric Interview for Children and Adolescents – M.I.N.I. Kid (Modules: Major Depressive Episode / Manic Episode / Hypomanic Episode / Panic Disorder / Agoraphobia / Separation Anxiety Disorder / Social Anxiety Disorder (Social Phobia) / Specific Phobia / Obsessive-Compulsive Disorder / Posttraumatic Stress Disorder / Tourette’s Disorder / ADHD / Conduct Disorder / Oppositional Defiant Disorder / Anorexia Nervosa / Bulimia Nervosa / Binge-Eating Disorder / Generalized Anxiety Disorder / Adjustment Disorders) |
