# Supplementary material for: Impact of Early Medical Treatment for Transgender Youth: Protocol for the Longitudinal, Observational Trans Youth Care Study
Source: PubMed Central journal article supplement (PMC6647755; doi:10.2196/14434), 2019-07-09
Supplement: resprot_v8i7e14434_app3.pdf [file resprot_v8i7e14434_app3.pdf]

| Blocker Cohort – Parent Survey Measures                                                 |                                                                                                                    |
|-----------------------------------------------------------------------------------------|--------------------------------------------------------------------------------------------------------------------|
| Construct                                                                               | Measure                                                                                                            |
| Time of Completion: Baseline, 6-month, 12-month, 18-month, & 24-month follow-up periods |                                                                                                                    |
| Demographics                                                                            | Demographic questions for Blocker Cohort Parents                                                                   |
| Service Utilization                                                                     | Service Utilization Questions                                                                                      |
| Socio-Economic Status                                                                   | Socioeconomic Status Questions (for Adults)                                                                        |
| Religiosity & Spirituality                                                              | Modified Duke University Religion Index (DUREL)                                                                    |
| Calcium Intake                                                                          | Daily Calcium Intake Form                                                                                          |
| Gender Identity                                                                         | Parent Report Gender Identity Questionnaire (GIQC)                                                                 |
| Social Transitioning                                                                    | Social Transitioning Scale                                                                                         |
| Gender Dysphoria                                                                        | DSM 5 – Chicago adapted                                                                                            |
| Quality of Life                                                                         | Pediatric Quality of Life Inventory - Parent Report (PedsQL – PC)                                                  |
| Suicide Attempts                                                                        | Suicidality Questions                                                                                              |
| Self-harm                                                                               | Embedded in demographics questions                                                                                 |
| Parent Distress/Stress                                                                  | Parenting Stress Index                                                                                             |
| Social Relationships                                                                    | Empathic Behaviors / Peer Rejection / Positive Peer Interactions / Social Withdrawal (Parent Report) – NIH Toolbox |
| Negative Affect                                                                         | Anger / Fear / Sadness (Parent Report) – NIH Toolbox                                                               |
| Psychological well-being                                                                | General Life Satisfaction / Positive Affect (Parent Report)– NIH Toolbox                                           |
| Self-Efficacy                                                                           | Self-Efficacy (Parent Report) – NIH Toolbox                                                                        |
| Perceived Parent Support                                                                | Parental Support Scale – Parent Version                                                                            |
| Autism                                                                                  | Autism-Spectrum Quotient (AQ-10) – Child                                                                           |

| Child Behavior Checklist (CBCL) (Collected online through ASEBA system) |                                                                                                                                                                                                                                                                                                                                                                                                                                                                                                                                                               |
|-------------------------------------------------------------------------|---------------------------------------------------------------------------------------------------------------------------------------------------------------------------------------------------------------------------------------------------------------------------------------------------------------------------------------------------------------------------------------------------------------------------------------------------------------------------------------------------------------------------------------------------------------|
| Time of Completion: Baseline, 12-month, & 24-month follow-up periods    |                                                                                                                                                                                                                                                                                                                                                                                                                                                                                                                                                               |
| Depression/Externalization                                              | Child Behavior Checklist (CBCL)                                                                                                                                                                                                                                                                                                                                                                                                                                                                                                                               |
| DSM Diagnoses <sup>a</sup>                                              | Mini International Neuropsychiatric Interview for Children and Adolescents – M.I.N.I. Kid (Modules: Major Depressive Episode / Manic Episode / Hypomanic Episode / Panic Disorder / Agoraphobia / Separation Anxiety Disorder / Social Anxiety Disorder (Social Phobia) / Specific Phobia / Obsessive-Compulsive Disorder / Posttraumatic Stress Disorder / Tourette’s Disorder / ADHD / Conduct Disorder / Oppositional Defiant Disorder / Anorexia Nervosa / Bulimia Nervosa / Binge-Eating Disorder / Generalized Anxiety Disorder / Adjustment Disorders) |

<sup>a</sup> Parent/Caretaker participation optional
