# Supplementary material for: Impact of Early Medical Treatment for Transgender Youth: Protocol for the Longitudinal, Observational Trans Youth Care Study
Source: PubMed Central journal article supplement (PMC6647755; doi:10.2196/14434), 2019-07-09
Supplement: resprot_v8i7e14434_app5.pdf [file resprot_v8i7e14434_app5.pdf]

| <b>Anthropometric and Physiologic Data for Both Cohorts</b>                             |                                                                                                                                                                     |
|-----------------------------------------------------------------------------------------|---------------------------------------------------------------------------------------------------------------------------------------------------------------------|
| <b>Form</b>                                                                             | <b>Fields</b>                                                                                                                                                       |
| Time of Completion: Baseline, 6-month, 12-month, 18-month, & 24-month follow-up periods |                                                                                                                                                                     |
| Health Data Report                                                                      | Height, weight, blood pressure, insurance plan at baseline                                                                                                          |
| Visit Report Log                                                                        | Study items administered, items administered within window, reasons items not administered or administered outside of window, incomplete items, additional comments |
| Lab Results                                                                             | luteinizing hormone, follicle stimulating hormone, estradiol, testosterone, calcium, alkaline, serum phosphorus, vitamin D                                          |
| Diagnoses log                                                                           | Diagnosis name, date, and comments                                                                                                                                  |
| Medications                                                                             | Medication name, dose, unit, route, frequency, start date, stop date, comments                                                                                      |
| Breast and Modified Ferriman-Gallwey Measurements (Gender affirming hormone cohort)     | Breast hemi-circumference (for transfeminine participants), Modified Ferriman-Gallwey Scale (for transmasculine participants)                                       |
| Time of Completion: Baseline, 12-month, & 24-month follow-up periods                    |                                                                                                                                                                     |
| QCT/DXA (Blocker)                                                                       | Read by male/female standards, radiologist read, endocrinologist read, QCT or DXA measurements                                                                      |
